# Supplementary material for: Assisted Reproductive Technology affects developmental kinetics, H19 Imprinting Control Region methylation and H19 gene expression in individual mouse embryos
Source: PubMed Central journal article supplement (PMC2169233; doi:10.1186/1471-213x-7-116), 2007-10-18
Supplement: 1471-213X-7-116-S2.pdf [file 1471-213X-7-116-S2.pdf]

**Granulosa cell**

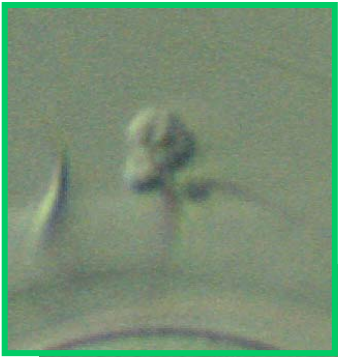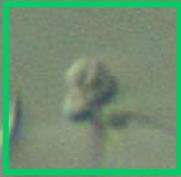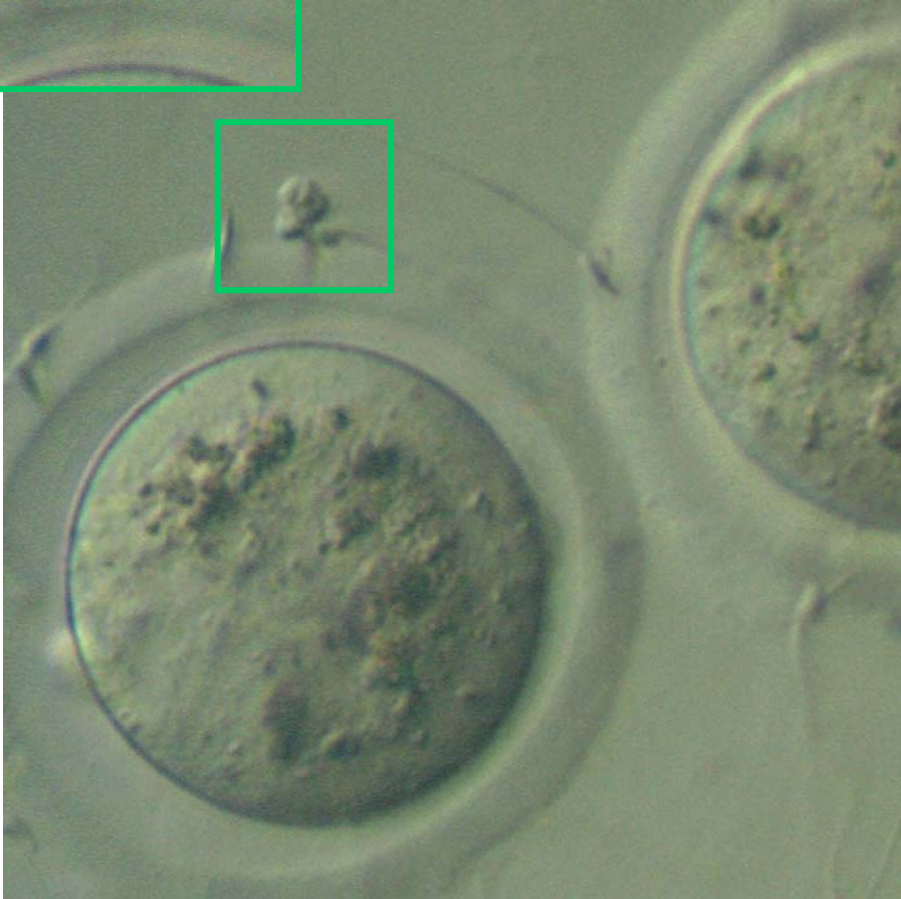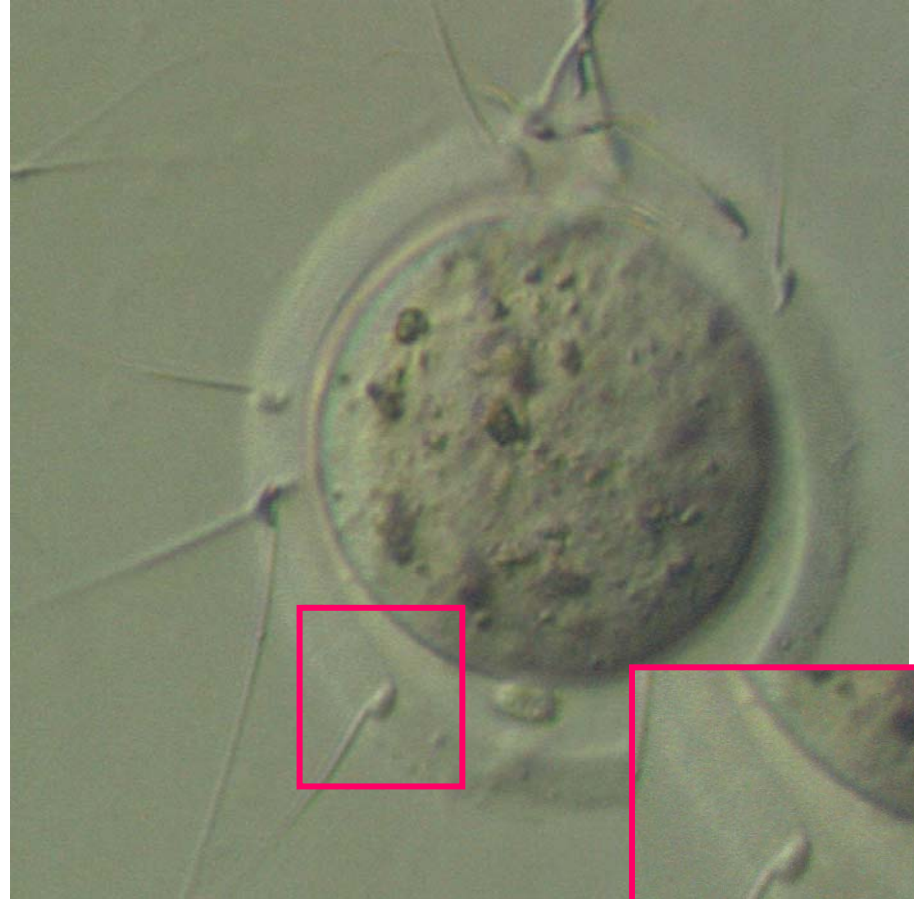

**Spermatozoa fixation**
